# Supplementary material for: Body image alterations in eating disorders patients: a systematic review of neuroimaging studies
Source: Research Square preprint supplement (doi:10.21203/rs.3.rs-4726800/v1), 2024-08-09
Supplement: Supplementary file 1 [file be2f57e74f163cc43baee40e.docx]

**Title Page**

**Discover Medicine**

**Body image alterations in eating disorders patients: a systematic review**

**of neuroimaging studies**

**Marcela Nunes Paulino de Carvalho**1

macarvalho854@gmail.com

**Manuela Capezzuto Fernandes Dias1**

manuelacapezzuto@gmail.com

**Thiago De Raphael Nogueira1**

thiago.raphael@hc.fm.usp.br

**Táki Athanássios Cordás**1

cordas@usp.br

**Paula Costa Teixeira**1

paulapct@usp.br

1 Eating Disorders Program, Psychiatry Institute, Clinical Hospital of Medicine School,

University of São Paulo, São Paulo, Brazil

Correspondence to: Eating Disorders Program, Psychiatry Institute, Clinical Hospital of Medicine School, University of São Paulo, São Paulo, Brazil.

*E-mail address:* [macarvalho854@gmail.com](mailto:macarvalho854@gmail.com) (M.N.P. Carvalho).

**Appendix A. Supporting information**

Descriptors with boolean operators:

- Lilacs, Scielo, Pepsic, APA/Psycnet, Pubmed

("neuroimaging" OR "brain image" OR "fMRI" OR "PET" OR "DTI" OR "CAT" OR "DOI" OR "DOT" OR "EROS" OR "NIRS" OR "HD-DOT" OR "MRI" OR "ASL" OR "MEG" OR "VOXEL based morphometry" OR "RSFC" OR "EEG" OR "SPECT") AND ("eating disorder" OR "eating disorders" OR "feeding disorders" OR "feeding disorder“ OR "anorexia nervosa" OR "AN" OR "bulimia nervosa" OR "BN" OR "binge eating disorders" OR "binge eating disorder" OR "binge-eating disorder" OR "binge-eating disorders" OR "BED") AND ("body image" OR "body representation").

- Bireme

“fMRI” AND “eating disorder” AND “body image”; “PET” AND “eating disorder” AND “body image”; “DTI” AND “eating disorder” AND “body image”; “CAT” AND “eating disorder” AND “body image”; “DOI” AND “eating disorder” AND “body image”; “DOT” AND “eating disorder” AND “body image”; “EROS” AND “eating disorder” AND “body image”; “NIRS” AND “eating disorder” AND “body image”; “HD-DOT” AND “eating disorder” AND “body image”; “MRI” AND “eating disorder” AND “body image”; “ASL” AND “eating disorder” AND “body image”; “MEG” AND “eating disorder” AND “body image”; “VOXEL based morphometry” AND “eating disorder” AND “body image”; “RSFC” AND “eating disorder” AND “body image”; “EEG” AND “eating disorder” AND “body image”; “SPECT” AND “eating disorder” AND “body image”; “neuroimaging” AND “eating disorder” AND “body image”; ("fMRI" OR "PET" OR "DTI" OR "CAT" OR "DOI" OR "DOT" OR "EROS" OR "NIRS" OR "HD-DOT" OR "MRI" OR "ASL" OR "MEG" OR "VOXEL based morphometry" OR "RSFC" OR "EEG" OR "SPECT") AND (“eating disorder”) AND (“body image”).

- Scopus

("fMRI" OR "PET" OR "DTI" OR "CAT" OR "DOI" OR "DOT" OR "EROS" OR "NIRS" OR "HD-DOT" OR "MRI" OR "ASL" OR "MEG" OR "VOXEL based morphometry" OR "RSFC" OR "EEG" OR "SPECT") AND (“eating disorder”) AND (“body image”).

- Cochrane

("fMRI" OR "PET" OR "DTI" OR "CAT" OR "DOI" OR "DOT" OR "EROS" OR "NIRS" OR "HD-DOT" OR "MRI" OR "ASL" OR "MEG" OR "VOXEL based morphometry" OR "RSFC" OR "EEG" OR "SPECT") AND (“eating disorder”) AND (“body image”); “neuroimaging” AND “eating disorder” AND “body image”.
