# Supplementary material for: Body image alterations in eating disorders patients: a systematic review of neuroimaging studies
Source: Research Square preprint supplement (doi:10.21203/rs.3.rs-4726800/v1), 2024-08-09
Supplement: Supplementary file 2 [file fc1c1df3c775547d01b26f42.xlsx]

## Sheet: Planilha1
Authors	Aims	Sample				Measures		Key Findings		NEWCASTLE-OTTAWA
		N	Age	BMI	Disease Duration	Scales/Subscales	Neuroimaging Tools
SEEGER et al., 2002	To investigate the effects of body image distortion on the amygdala.	AN=3	17+/-0.5	15.3+/-0.6	NR	BSQ; Intelligence or Educational Level Test	fMRI	Right amygdala and right fusiform gyrus activation in AN patients when confronted with their own distorted body shape.		7
		CG=3	17+/-0.5	18.7+/-0.6	/
SACHDEV et al., 2008	To verify whether the evaluation of self-image of ED patients differs from controls.	AN=10	18.8+/-1.69	16.4+/-1.03	IC=12-48	EAT; MADRS; STAI-STATE; BSQ	fMRI	Patients had reduced signal in the paracentral lobe, precuneus, superior temporal gyrus, cuneus and lingual gyrus. In the group of patients, there seems to be no involvement of the attention system or the insula, as well as suppression of emotional and perceptual processing of information. This differential processing of self-images, which is the characteristic disorder found in this group, could…		8
		CG=10	22.6+/-2.07	22.17+/-1.74	/
BEATO-FERNÁNDEZ et al., 2009	To verify whether AN patients differ from BN patients and control participants with regard to the patterns of change in regional cerebral blood flow (rCBF) from baseline to their own body image exposure and from baseline to a neutral stimulus exposure.	AN=9	25.2	18	NR	BDI-II; STAI-TRAIT; BSQ; SILHOUETTE TEST;	SPECT	BN: Hyperactivation in the temporal and occipital areas. Limbic system involved in body dissatisfaction. AN: when faced with a neutral stimulus, there was hypoactivation of the left parietal and right superior frontal areas; when the stimulus is the image of the patients' own bodies, there was hyperactivation of the same areas.		8
		BN=13	28.4	22.8	NR
		CG=12	20.2	21.5	/
FRIEDERICH et al., 2010	To investigate self-other body-shape comparison to establish neural correlates of body dissatisfaction in patients with AN.	AN=17	24.9+/-5.6	15.6+/-1.4	86.4+/-51.6	SCID; EDE-Q; Anxiety Rating to (0-10); MBSRQ; BASS; HAD	fMRI	AN: decreased activation in the region involving emotional processing (rostral anterior cingulate cortex) in patients compared to controls. Patients with AN showed altered activations in regions involved in interoceptive awareness and representation of their own bodies. The insula and premotor cortex were more activated, and the ACC was less activated than in the CG. These differential activation…		7
		CG=18	23.3+/-6.1	21.9+/-2.5	/
MIYAKE et al., 2010	To investigate the neural correlates of bodyimage perception in three subtypes of EDs and healthy women, examining cerebral responses to morphed images of subjects' own bodies as well as that of another woman.	AN-R=11	22.2+/-4.1	15.3+/-1.8	49.2+/-39.6	SCID; EHI; EDI-2; Evaluation of the Images Stimuli	fMRI	Self body-image task AN: Significant activation of the right amygdala and right fusiform gyrus. Self body-image task AN-P: Significant activation of the right amygdala, right fusiform gyrus, dorsolateral prefrontal cortex and medial prefrontal cortex. Self body image task BN: significant activation of the right occipital lobe and right parietal lobe. Right amygdala was significantly more activate…		9
		AN-P=11	28.3+/-4.5	15.9+/-1.9	94.8+/-52.8
		BN=11	24.5+/-5.8	20.2+/-2	76.8+/-52.8
		CG=11	26.5+/-5.5	19.1+/-2	/
MIYAKE et al., 2010	To investigate the functional abnormalities in various brain systems during processing of negative words concerning body image in EDs.	AN-R=12	27+/-9	15.2+/-2.1	63.6+/-44.4	SCID; EHI; EDI-2; Emotional Decision Task	fMRI	Increased activation in the amygdala and medial prefrontal cortex. In response to negative body image words, the right amygdala was significantly activated in both AN-R and AN-P patients, and the left medial prefrontal cortex was significantly activated in BN patients and in patients with AN-P. AN-R and AN-P showed hyperactivation in the left inferior parietal lobe and activation of the inferior …		9
		AN-P=12	27.1+/-4.8	15.5+/-1.6	76.8+/-50.4
		BN=12	25+/-6.9	21.2+/-2.2	61.2+/-51.6
		CG=12	25.4+/-5.8	18.8+/-2	/
MOHR et al., 2010	To investigate the neural correlates of two parts of the own body image using functional magnetic resonance imaging (fMRI): satisfaction rating and size estimation for distorted own body photographs in patients with anorexia nervosa and controls.	AN=16	24.1+/-3.4	15.9+/-1.25	NR	STUNKARD SILHOUETTE TEST	fMRI	Individuals with AN demonstrated stronger activation of the insula and lateral anterior prefrontal cortex in the satisfaction rating for thinner self-images. The high activation existing in the lateral anterior prefrontal cortex for patients with AN could, therefore, be a result of a greater affective value in relation to thinner self-images.		7
		CG=16	25.6+/-4.5	21.7+/-2.5	/
SUCHAN et al., 2010	This study aimed at looking for alterations in gray matter density in women with (AN) especially in the EBA.	AN=15	26.8+/-8.4	16+/-1.3	66+/-60	SCID; OHS; CONTOUR DRAWING RATING SCALE	MRI	The main finding of the present study was that women suffering from AN had a significantly reduced gray matter volume in the left lateral occipital cortex functionally covering the extrastriate body area. A second focus was found in the superior temporal gyrus. The posterior part of the superior temporal gyrus has been shown to be involved in processing the body. This focus of gray matter reducti…		7
		CG=15	29.5+/-8.2	22+/-2.1	/
VOCKS et al., 2010	To compare ED patients and CG regarding neuronal correlates when exposed to photos of their own bodies and those of another woman, as well as their self-reported emotional responses to these stimuli.	AN=13	29.08+/-9.79	15.75+/-1.28	86.52+/-74.4	SCID; EDI-2; EDE-Q; BDI-II; BIAQ; POSITIVE AND NEGATIVE AFFECT SCHEDULE	fMRI	BN: reduced activation in the left inferior temporal gyrus. AN: reduced activation in the left inferior parietal lobe. AN/BN: reduced activation in the left medial temporal gyrus. Left inferior parietal lobe was underactivated in AN and BN in response to looking at one's own body.		7
		BN=15	28.4+/-7.07	21.34+/-2.26	141.84+/-90.12
		CG=27	26.74+/-7.6	22.06+/-2.06	/
BEATO-FERNÁNDEZ et al., 2011	To identify which psychopathological and neurobiological variables could have a discriminating capacity regarding the different EBD diagnostic subtypes.	AN-R=11	27.1	18.1	NR	BITE; EDI-2; EAT; HDRS/HARS; BDI-II; STAI-TRAIT; BSQ; SILHOUETTE TEST; Rosenberg self-esteem scale	SPECT	AN-R and BN-P showed increased regional cerebral blood flow at the right temporal level. BN-NP there was a decrease in blood flow in the right temporal lobe, as well as in the CG.		8
		AN-P=10	28.38	17.67	NR
		BN=14	30.69	22.92	NR
		BN-NP=7	34.71	33.2	NR
		CG=12	20.58	21.52	/
MOHR et al., 2011	To investigate the neural correlates of two components of the body image: (1) satisfaction rating of one's own body and (2) body size estimation.	BN=15	24.6+/-3.2	22+/-2.1	NR	STUNKARD SILHOUETTE TEST	fMRI	Activity in the anterior insula and medial frontal gyrus/CAC is higher for the satisfaction index, and the amount of activity in the insula reflects the pattern of the satisfaction index. The amount of bilateral insula activity reflected the pattern of the satisfaction rating task for bulimia nervosa and control participants: for the BN group a linear trend occurred with a decline in insula activ…		7
		CG=15	25.5+/-4.5	21.8+/-2.6	/
SPANGLER et al., 2012	To verify the role of body-oriented self-schemas in the etiology of EDs.	BN=12	IC=18-38	IC=19.25-27.80	NR	EDDS; EDE; EDE-Q	fMRI	mPFC activation was greater in BN patients than in control participants in the larger-body exposure condition, whereas there was no difference between groups in the smaller-body exposure condition. mPFC activation was significantly higher for patients with BN. However, the location of the activation spike for patients with BN was in the rostral ACC. The activation of the rostral ACC together with…		7
		CG=12	IC=18-30	IC=18.50-26.90	/
AMIANTO et al., 2013	The aim of the present study was to use VBM to characterize brain abnormalities of AN and BN patients who had received their first diagnosis of an ED, comparing the groups with each other and with healthy controls, in order to investigate those brain abnormalities which could be specifically linked to each ED diagnosis and to correlate them with clinical and demographic features.	AN=17	20+/-4	16+/-1	13+/-8	SCID; EDI-2; BDI-II	MRI/VBM	Increased gray matter volume in ED cases: paracentral lobe, precuneus, and somatosensory regions. AN: Atrophy of the fusiform area, atrophy in other regions of the occipital cortex, such as the corpus extrastriatum area. BN: reduction in gray matter volume in the bilateral caudate nucleus.		8
		BN=13	22+/-3	22+/-2	10+/-5
		CG=14	24+/-3	21+/-2	/
CASTELLINI et al., 2013	To explore differences and similarities in the neural network activated by the visual processing of one's own body image in AN patients.	AN=18	24.94+/-7.75	16.07+/-1.42	67.08+/-82.08	SCID; EDE-Q; BUT	fMRI	AN: increased activity in the dorsolateral prefrontal cortex.		7
		CG=19	26.48+/-1.92	20.75+/-1.77	/
SUCHAN et al., 2013	To investigate the network and its effective connectivity subserving body processing in women suffering from anorexia nervosa (AN) and also in healthy controls.	AN=10	26+/-9	15.7+/-1.5	66+/-60	SCID; OHS; CONTOUR DRAWING RATING SCALE	fMRI	Increased activation in the right fusiform body area covering the fusiform gyrus and extending to the inferior temporal and occipital gyrus also covering the right extrastriate body area. Additional activation was found in the parietal lobe, inferior frontal gyrus, and middle occipital gyrus. The highest activation was found in the left side of the brain covering the extra striatum area and the f…		7
		CG=15	30+/-8	22+/-2	/
SUDA et al., 2013	To examine the neuroanatomy involved in altered perception and identification with body checking in female with anorexia nervosa (AN).	AN=20	27+/-7.5	15.7+/-1	64.8+/-72	SCID; EDE-Q; ANXIETY RATING TO (0-10) FOR TASK	fMRI	Patients with AN showed a significant increase in right parietal lobe activation in response to body scan images when compared to neutral images. AN patients had significantly reduced activation of the medial PFC and the right fusiform gyrus.		8
		CG=15	26+/-6.8	21.9+/-2.4	/
VAN den EYNDE et al., 2013	To investigate brain activation patterns associated with the processing of food stimuli and body image.	BN=21	28+/-7.1	23.4+/-5	0-60 (n=3) /60-120 (n=12) / 120-180 (n=3) / >180 (n=3)	EDE-Q; FCQ-T/S; SAAS; PACS; VAS	fMRI	BN: comparison task with bodies considered ideal lead to greater involvement of the insula and lesser involvement of the fusiform gyrus. This results in greater self-focus of patients with BN when compared to bodies considered ideal.		8
		CG=23	27.3+/-5.1	21.3+/-5.1	/
LAVAGNINO et al., 2014	To investigate: 1) ininvestigating the rs-FC in the somatosensory network and in other networks that might be altered in eating disorders, and 2) intesting how that is related to three psychopathological symptoms of BN: bulimia (a defining feature of the disorder), body dissatisfaction, and interoceptive awareness (two body-related symptom dimensions).	BN=16	23+/-5	22+/-6	17+/-12	SCID; EDI-2	fMRI	BN: decrease in functional connectivity at resting-state both within the somatosensory network and with the posterior cingulate cortex and two visual areas (the right middle occipital gyrus and the right cuneus). The functional connectivity at resting-state of the left paracentral lobe with the right middle occipital gyrus correlated with measures of psychopathology such as bulimia and interocept…		8
		CG=18	23+/-3	21+/-2	/
LEE et al., 2014	To investigate resting state functional connectivity of the dorsal anterior cingulate cortex.	AN=18	25.2+/-4.2	16+/-1.7	178.8+/-18	SCID; EDI-2; BDI-II; BAI; BSQ	fMRI	Between group comparisons revealed that the anorexia nervosa group exhibited stronger synchronous activity between the dACC and retrosplenial cortex, whereas the bulimia nervosa group showed stronger synchronous activity between the dACC and medial orbitofrontal cortex. Both groups demonstrated stronger synchronous activity between the dACC and precuneus, which correlated with higher scores of th…		9
		BN=20	22.9+/-3.9	21.6+/-2.3	45.6+/-56.4
		CG=20	23.3+/-1.8	19.9+/-1.9	/
McADAMS et al., 2016	To investigate whether women with AN, as well as those recovered from AN, had similar neural activations during social and physical self-perception.	AN=22	27.6+/-7.6	17.6+/-1.5	NR	SCID; EDE-Q; EAT; QIDS-CR; SIGH-A; WASI	fMRI	Recovered AN (AN-rec): Differences in utilization were found in regions of the salience network (dorsolateral anterior cingulate cortex and bilateral insula) during social self-assessment, suggesting a neural difference that may be important for sustained weight regain. AN: increased bilateral fusiform activations (greater neural activation in the visual regions when seeing themselves compared to…		7
		ANrec=18	29.6+/-8.1	22.8+/-2.7	NR
		CG=19	27.9+/-6	22.5+/-2.4	/
PHILLIPOU et al., 2016	To investigate resting state functional connectivity in AN in networks related to self-referential processing (default mode network) and body image (sensory-motor and visual networks).	AN=26	22.81+/-6.67	16.63+/-1.19	77.04+/-89.16	MINI; EDE-Q; FRS; WTAR	fMRI	Reduced functional connectivity between sensorimotor and visual networks in AN. Specifically, we found reduced functional connectivity between primary somatosensory, secondary visual, and visual associative cortices; and between primary motor, secondary visual, and associative visual cortices in participants with AN. This reduced connectivity suggests a visual-motor disturbance in AN.		7
		CG=27	22.46+/-3.16	22.6+/-3.53	/
KOHMURA et al., 2017	To evaluate the relationships between regional volume changes in the brain and clinical symptoms of thinness motivation and body dissatisfaction.	AN=23	28.5+/-6.7	13.2+/-1.5	126+/-74.4	SCID; EDI-2; BDI-II	MRI	AN: Network gray matter volume was significantly less, whereas cerebrospinal fluid was increased. Both in volume and in fraction, there was a decrease in gray matter and an increase in cerebrospinal fluid. Decrease in gray matter volume was detected in the right superior temporal gyrus and the right middle temporal gyrus. Decreased volume in the pulvinar.		8
		CG=29	28.2+/-7	21.5+/-3.3	/
SCAIFE et al., 2017	To compare the functional connectivity of resting state networks in individuals with AN and recovered from AN and verify the relationships they may have with the psychopathology of the eating disorder.	AN=12	29.4+/-6	15.4+/-1.9	123.6+/-62.4	SCID; YBC-EDS-SRQ; EDE-Q; BDI-II; STAI-TRAIT; STAI-STATE; VAS; NART	MRI/fMRI	Significantly decreased temporal correlation (coherence) was observed in the contrast: HC greater than AN and AN-R within the auditory network in clusters in the following regions: the right insula extending into the central opercular cortex, the left opercular cortex, right Heschl’s gyrus, the right precentral gyrus extending into the inferior frontal and postcentral gyri, the left precentral an…		7
		ANrec=14	27+/-6.5	20.9+/-1.6	69.6+/-50.4
		CG=16	24.3+/-5.7	21.2+/-2	/
DAVIDOVIC et al., 2018	To determine the neural correlates of affective touch processing in AN.	AN=25	20.3+/-2.2	16.3+/-1	49.2+/-42	SCID; EHI; BDI-II; Skin Stroking Pleasantness Rating	fMRI	AN: reduced activation in the left caudate nucleus, bilateral frontal lobe, bilateral precuneus, right temporal lobe, and lateral occipital cortex.		7
		CG=25	21.2+/-2.1	21.1+/-2.3	/
GAUDIO et al., 2018	To investigate resting-state functional connectivity of the whole brain in a sample of subjects who had not yet received treatment for AN and who were in the early stages of the disease.	AN=15	15.7+/-1.7	16.1+/-1.2	4+/-1.8	SCID; EDI-2; STAI-TRAIT;	MRI	AN: at the earliest stages of the disease showed a reduced functional connectivity in a sub-network which comprises the rostral ACC bilaterally, left paracentral lobule, left cerebellum (10th lobule), left posterior insula, left medial OFC, and right SOC compared to controls. Patients with AN did not have a subnet with greater connectivity compared to controls.		8
		CG=15	16.1+/-1.4	21.6+/-2.5	/
VIA et al., 2018	To assess the links between DMN self-evaluative processes and body image perception in AN patients.	AN=20	28.4+/-9.3	16.94+/-1.26	85.2+/-76.88	SCID; GHQ; TCI/TCI-R; HDRS/HARS; CCQ;	fMRI	AN patients showed a hyperactivation of the dorsal posterior cingulate cortex during their own-body processing but a response failure to another’s body processing at the precuneus and ventral PCC. Increased task-related connectivity was found between dPCC–dorsal anterior cingulate cortex and precuneus–mid-temporal cortex. Further, AN patients showed decreased resting-state connectivity between th…		8
		CG=20	28.15+/-8.62	20.99+/-1.82	/
BURKERT et al., 2019	To analyze a possible connection between comorbidities, body image disturbances, and the volume of the amygdala in patients with AN.	AN=21	21.6+/-5.7	17.5	52.8+/-39.6	SCL-90R; EDI-2; Fbek	MRI	AN: decreased amygdala volume compared to controls, as well as reduced hippocampal volume. A decreased volume of the amygdala is related to reduced volumes of gray matter and white matter.		7
		CG=21	21.7+/-5.7	IC=18.5-25	/
DOMAKONDA et al., 2019	To assess within and between VAN and DMN network connectivity in adolescent girls with BN.	BN=33	17.5+/-1.6	22.1+/-3.1	29.7+/-20.7	SCID; EDE; CTP; EDE-Q; BDI-II; WASI	MRI	BN demonstrated altered VAN-DMN (ventral attention and default mode network) connectivity. Connectivity RvSMG-LLP (right ventral supramarginal gyrus-left lateral cortex) and VLPFC-LLP (ventrolateral prefrontal cortex-left lateral cortex) positively associated with shape/weight issues on the EDE-Q subscales.		7
		CG=37	16.9+/-2.3	21.8+/-2.6	/
YOKOKURA et al., 2019	To investigate whether 5HTT was altered in underweight patients with AN.	AN=22	24.8+/-6	14.4+/-1.4	62.4+/-68.4	SCID; EDI-2; BDI-II; STAI-STATE; YALE-BROWN OBSESSIVE-COMPULSIVE SCALE; RAVEN'S COLORED PROGRESSIVE MATRICES FOR GENERAL INTELLIGENCE; STROOP TEST; IOWA GAMBLING TASK OF NET TOTAL SCORE TO ASSESS DECISION MAKING; DOT-PROBE TASK	MRI/PET	The current results revealed decreased 5HTT availability in the medial parietal cortex of patients with AN compared with healthy subjects. Redução significativa em 5HTT nesta região (a área de associação somatossensorial) em ambos os subtipos. Significant reduction in 5HTT in this region (the somatosensory association area) in both subtypes.		7
		AN-R=12	24.3+/-6	13.8+/-1.3	50.4+/-60
		AN-P=10	25.4+/-6.2	15.2+/-1.3	76.8+/-78
		CG=20	22.4+/-3.2	20.5+/-2.2	/
HORNDASCH et al., 2020	To examine changes in brain activation when participants were asked to estimate both the body size and the subjective emotions illicited with respect to different body shapes presented using a standardized picture set.	ANteen=15	15.72+/-1.93	P/I=5.33+/-11.67	16.86+/-15	EDI-2; BDI-II; PACS; SATAQ;	fMRI	Differential effects on activation, depending on the BMI of the women shown in the pictures, were found in frontal brain regions, the thalamus, the caudate and the fusiform gyrus. Group effects differentiating between AN patients and control participants were seen mainly in the caudate and insula.		8
		AN=19	26.27+/-6.71	16.06+/-2.04	73.35+/-79.82
		CGteen=18	16.45+/-1.35	P/I=56.33+/-25.48	/
		CG=17	27.03+/-5.46	21.4+/-1.4	/
WANG el at., 2020	To clarify the resting-state functional connectivity changes between striatal subregions and other eating-related brain regions within the whole brain range.	BN=51	NR	20.8+/-2.2	22.8+/-15.6	MINI; SCID; EDI-1; HAMD; HAMA	fMRI	The findings indicate bulimia nervosa-related alterations in striatal functional connectivity with the dorsolateral prefrontal cortex supporting self-regulation, the subcortical striatum and thalamus involved in taste reward, as well as the visual occipital and sensorimotor regions mediating body image.		7
		CG=53	NR	20.4+/-1.7	/
